# Supplementary material
Source: publisher site journal article supplement (https://www.degruyterbrill.com/publication/isbn/9783110239263/downloadAsset/9783110239263_Inhaltsverzeichnis.pdf)
Supplement: Supplementary file 1 [file 9783110239263_Inhaltsverzeichnis.pdf]

## Inhalt

|                                                                                                                                                                                                        |     |
|--------------------------------------------------------------------------------------------------------------------------------------------------------------------------------------------------------|-----|
| <i>Hermann Korte</i><br>Der junge Herr Publikum. Eichendorffs Tagebuch als theatergeschichtliche Quelle .....                                                                                          | 1   |
| <i>Helmut Koopmann</i><br>Konstruierte Wirklichkeiten. Zu Eichendorffs Lyrik .....                                                                                                                     | 35  |
| <i>Vera Bachmann</i><br>„Von Regensburg her“.<br>Zur Funktion außertextueller Referenzen in Eichendorffs Roman <i>Abnung und Gegenwart</i> ....                                                        | 55  |
| <i>Wolfgang Bunzel</i><br>„Im Rheingau, wo jetzt Rüdesheim liegt...“<br>Chronotopoi in Clemens Brentanos <i>Mährchen vom Rhein</i> .....                                                               | 65  |
| <i>Thomas Borgstedt</i><br>Der Raum des romantischen Sonetts .....                                                                                                                                     | 81  |
| <i>Ralf Junkerjürgen</i><br>Raum und Raumkonzept im Theater Calderóns .....                                                                                                                            | 101 |
| <i>Jürgen Daiber</i><br>„Alle diese Abscheulichkeiten, und nichts zu sehen, als rundum den Himmel“ –<br>Narrative Konstruktionen des urbanen Raumes in Heinrich von Kleists<br>Briefen aus Paris ..... | 113 |
| <i>Volkmar Stein</i><br>Bericht über den 20. Internationalen Kongress der Eichendorff-Gesellschaft<br>vom 7. bis 9. Oktober 2010 in Regensburg .....                                                   | 127 |
| <i>Ursula Regener</i><br>Verleihung der Eichendorff-Medaille 2010 an Hermann Korte. Laudatio .....                                                                                                     | 139 |
| <i>Ursula Regener</i><br>Eichendorff-Autographen im Freien Deutschen Hochstift.<br>Eine Handschriften-Inventur .....                                                                                   | 141 |
| Buchbesprechung                                                                                                                                                                                        |     |
| <i>Helmut Koopmann</i><br>Novalis. Leben und Werk Friedrich von Hardenbergs / Gerhard Schulz .....                                                                                                     | 185 |
| Anschriften der Beiträger .....                                                                                                                                                                        | 189 |
